# Supplementary material for: Estimating global surface ammonia concentrations inferred from satellite retrievals
Source: Copernicus journal article supplement (doi:10.5194/acp-19-12051-2019), 2019-09-26
Supplement: Supplementary file 1 [file acp-19-12051-2019-supplement.zip]

Archive with 3 entries (3 files):
- Matlab code.txt
- acp-19-12051-2019-supplement-title-page.pdf
- Supporting Information.pdf
