# Supplementary material for: Estimating global surface ammonia concentrations inferred from satellite retrievals
Source: Copernicus journal article supplement (doi:10.5194/acp-19-12051-2019), 2019-09-26
Supplement: Supplementary file 1 [file acp-19-12051-2019-supplement.zip › acp-19-12051-2019-supplement-title-page.pdf]

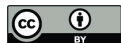

## *Supplement of*

# **Estimating global surface ammonia concentrations inferred from satellite retrievals**

**Lei Liu et al.**

*Correspondence to:* Lei Liu (liuleigeo@lzu.edu.cn) and Xiuying Zhang (zhangxy@nju.edu.cn)

- [acp-19-12051-2019-supplement-title-page.pdf](#)
- [Matlab code.txt](#)
- [Supporting Information.pdf](#)

The copyright of individual parts of the supplement might differ from the CC BY 4.0 License.
