# Supplementary material for: Estimating global surface ammonia concentrations inferred from satellite retrievals
Source: Copernicus journal article supplement (doi:10.5194/acp-19-12051-2019), 2019-09-26
Supplement: Supplementary file 1 [file acp-19-12051-2019-supplement.zip › Matlab code.txt]

Matlab codes for the paper 
Liu, L., Zhang, X., Wong, A. Y. H., Xu, W., Liu, X., Li, Y., Mi, H., Lu, X., Zhao, L., Wang, Z., and Wu, X.: Estimating global surface ammonia concentrations inferred from satellite retrievals, Atmos. Chem. Phys. Discuss., https://doi.org/10.5194/acp-2019-184, 2019.

--------------------
%%Gaussian function, see the the equation (2) in the main text

function [fitresult, gof] = createFit2(H, X) % X: Height (m); Y: NH3 concentrations
[xData, yData] = prepareCurveData( H, X );

% if three items of Gaussian fit were used, change 'gauss2' to 'gauss3'
% if six items of Gaussian fit were used, change 'gauss2' to 'gauss6'

ft = fittype( 'gauss2' ); %'a1*exp(-((x-b1)/c1)^2) + a2*exp(-((x-b2)/c2)^2)'

opts = fitoptions( ft );
opts.Display = 'Off';
opts.Lower = [-Inf -Inf 0 -Inf -Inf 0];
opts.StartPoint =[]; 
opts.Upper = [Inf Inf Inf Inf Inf Inf];
[fitresult, gof] = fit( xData, yData, ft, opts );


--------------------
%%Implementation code

clear;clc;
NH3Con_dir=' /globe/nc/tif/NH3_level/month';
hdir=' /globe/nc/tif/boxheight/month';
tropleveldir='/globe/nc/tif/boxTropHeight/month';
txtdir=' globe/NH3profiles';
row=91;
col=144;
level=47; 
I=zeros(row,col,level);                                      
Ih=I;                                                   
y=(1:level);  

%save parameters {(row, col, n, [4-21, (¦Ñ(max,i), Z0,i, ¦Òi)], R2, RMSE                  
gaussianParameters=zeros(1,23);  


for yearnum=2014:1:2014 % or for other years
    for monthnum=1:1:12                               
      if monthnum==1||monthnum==3||monthnum==5||monthnum==7||monthnum==8...
          ||monthnum==10||monthnum==12
            todate=31;
        elseif monthnum==4||monthnum==6||monthnum==9||monthnum==11
            todate=30;
        elseif ((mod(yearnum,4)==0 && mod(yearnum,100)~=0)||(mod(yearnum,400)==0))
            todate=29;
        else todate=28;
        end

            for layernum=1:1:level    
                year=num2str(yearnum);
                month=num2str(monthnum);
                layer1=num2str(layernum);
                filename=strcat(NH3Con_dir,'/',year,'_',month,'CL',layer1,'.tif');
                filename_h=strcat(hdir,'/',year,'_',month,'CL',layer1,'.tif');
                if exist(filename,'file')                
                    layeri=imread(filename);
                    I(:,:,layernum)=layeri*14/22.4; %convert ppb to ug N m-3
                    fprintf('%s /n',filename);
                else fprintf('%s doesnt exist /n',filename); break;
                end
                if exist(filename_h,'file')                 
                    layeri_h=imread(filename_h);
                    Ih(:,:,layernum)=layeri_h;     
                    fprintf('%s /n',filename_h);
                else fprintf('%s doesnt exist /n',filename_h); break;
                end
            end          

            j1=1;                                    
            txtfilename=strcat(txtdir,'/',year,'_',month,'.txt');
            fout=fopen(txtfilename,'w');            
            paraNames={'x','y','bestPerform_N','a1','b1','c1','a2','b2','c2','a3','b3','c3','a4','b4','c4','a5',...
                                'b5','c5','a6','b6','c6','R2','RMSE'};

            for ii=1:1:23
                if ii<=3
                    fprintf(fout,'%5s ',paraNames{ii});
                else
                    fprintf(fout,'%20s ',paraNames{ii});
                end
            end
            fprintf(fout,'/r/n');            
            filename_tropl=strcat(tropleveldir,'/',year,'_',month,'CL1','.tif');% km
            if exist(filename_tropl,'file')                 
                layeri_troplevel=imread(filename_tropl);
                ITropL(:,:)=layeri_troplevel*1000;% m
                fprintf('%s /n',filename_tropl);
            else fprintf('%s doesnt exist /n',filename_tropl); break;
            end
             X=zeros(level,1);  
             H=zeros(level,1);                        
            for row1=1:1:row
                for col1=1:1:col
                    for i=1:1:level                            
                        X(i)=I(row1,col1,i);
                        H(i)=Ih(row1,col1,i);
                    end                    
                    dintroplevel=num2str(ITropL(row1,col1));
                    toplevel=num2str(Ih(row1,col1,level)); 
                    low1=num2str(Ih(row1,col1,1)); 


                    %% Gussian function
                    try
                    [para2,g2]=createFit2(H,X);
                    catch
                    end
                    spmd
                    [para3,g3]=createFit3(H,X);
                    end
                    [para4,g4]=createFit4(H,X);
                    [para5,g5]=createFit5(H,X);
                    [para6,g6]=createFit6(H,X);
                    RR=[g2.rsquare,g3.rsquare,g4.rsquare,g5.rsquare,g6.rsquare];
                    RMSE=[g2.rmse,g3.rmse,g4.rmse,g5.rmse,g6.rmse];
                    if g2.rsquare == max(RR) || g2.rmse == min(RMSE)
                        factor=[para2.a1,para2.b1,para2.c1,para2.a2,para2.b2,para2.c2,0,0,0,0,0,0,0,0,0,0,0,0,g2.rsquare,g2.rmse];
                        gaussianParameters=[row-row1+1,col1,2,factor];
                    else if g3.rsquare == max(RR) || g3.rmse == min(RMSE)
                            factor=[para3.a1,para3.b1,para3.c1,para3.a2,para3.b2,para3.c2,para3.a3,para3.b3,...
                                         para3.c3,0,0,0,0,0,0,0,0,0,g3.rsquare,g3.rmse];
                            gaussianParameters=[row-row1+1,col1,3,factor];
                        else if g4.rsquare == max(RR) || g4.rmse == min(RMSE)
                                factor=[para4.a1,para4.b1,para4.c1,para4.a2,para4.b2,para4.c2,para4.a3,para4.b3,para4.c3,...
                                             para4.a4,para4.b4,para4.c4,0,0,0,0,0,0,g4.rsquare,g4.rmse];
                                gaussianParameters=[row-row1+1,col1,4,factor];
                            else if g5.rsquare == max(RR) || g5.rmse == min(RMSE)
                                    factor=[para5.a1,para5.b1,para5.c1,para5.a2,para5.b2,para5.c2,para5.a3,para5.b3,para5.c3,...
                                                 para5.a4,para5.b4,para5.c4,para5.a5,para5.b5,para5.c5,0,0,0,g5.rsquare,g5.rmse];
                                    gaussianParameters=[row-row1+1,col1,5,factor];
                                    else if g6.rsquare == max(RR) || g6.rmse == min(RMSE)
                                        factor=[para6.a1,para6.b1,para6.c1,para6.a2,para6.b2,para6.c2,para6.a3,para6.b3,...
                                                   para6.c3,para6.a4,para6.b4,para6.c4,para6.a5,para6.b5,para6.c5,...
                                                   para6.a6,para6.b6,para6.c6,g6.rsquare,g6.rmse];
                                        gaussianParameters=[row-row1+1,col1,6,factor];                                        
                                    end
                                end
                            end
                        end
                    end                 
     
                    paramatrix=vpa(gaussianParameters);

                    j1=j1+1;
                    for ii=1:1:23
                        if ii<=3
                        fprintf(fout,'%5d ',double(paramatrix(1,ii)));
                        else
                        fprintf(fout,'%20.10f ',double(paramatrix(1,ii)));
                        end                     
                    end
                    fprintf(fout,'/r/n');                    
                end
            end
            fclose(fout);
            fprintf('%s /n',txtfilename);
    end

end
